# Supplementary material for: Facile synthesis of black phosphorus–Au nanocomposites for enhanced photothermal cancer therapy and surface-enhanced Raman scattering analysis
Source: Royal Society of Chemistry journal article supplement (doi:10.1039/c7bm00414a), 2017-01-01
Supplement: c7bm00414a1.pdf [file c7bm00414a1.pdf]

## **Supplementary Information**

### **Facile synthesis of black phosphorus-Au nanocomposites for enhanced photothermal cancer therapy and surface-enhanced Raman scattering analysis**

Guangcun Yang,<sup>†</sup> Zhiming Liu,<sup>†</sup> Yi Li, Yuqing Hou, Xixi Fei, Chengkang Su,  
Songmao Wang, Zhengfei Zhuang\* and Zhouyi Guo\*

MOE Key Laboratory of Laser Life Science & SATCM Third Grade Laboratory of  
Chinese Medicine and Photonics Technology, College of Biophotonics, South China  
Normal University, Guangzhou 510631, Guangdong, China.

<sup>†</sup> These authors contributed equally to this work.

\*Corresponding to: Dr. Zhengfei Zhuang and Prof. Zhouyi Guo

Telephone and fax: 86-20-85211428

E-mail: zhuangzf@scnu.edu.cn (Dr. Z.F. Zhuang); ann@scnu.edu.cn (Prof. Z.Y. Guo)

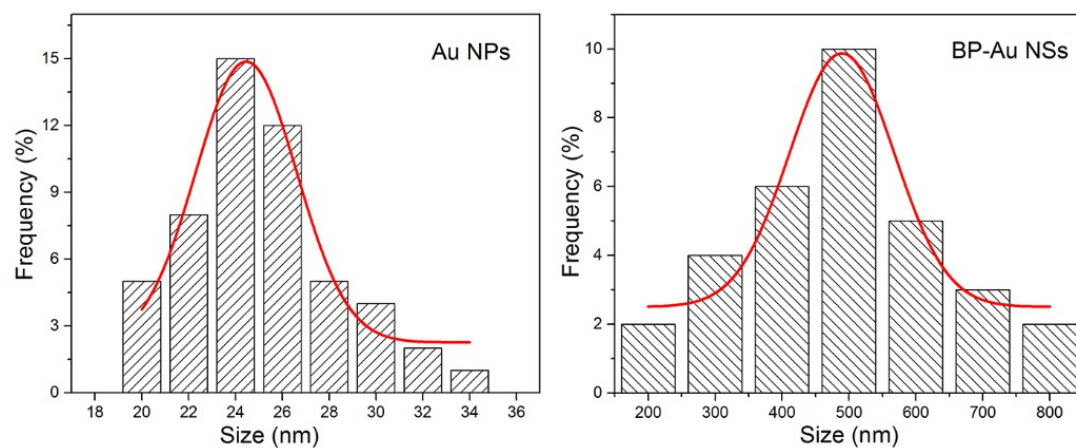

Fig. S1 The size distribution of BP-Au NSs and deposited Au NPs.

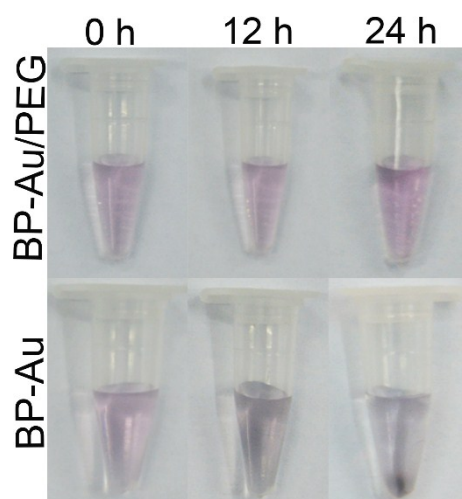

Fig. S2 The stability BP-Au nanosheets with and without PEG functionalization in physiological PBS solution.

The photothermal conversion efficiency ( $\eta$ ) was calculated using the following Eqs.<sup>1</sup>

$$\eta = hS (T_{\max} - T_{\max, \text{water}}) / I (1 - 10^{-A}) \quad (1)$$

$$hS = \sum mC_p / \tau_s \quad (2)$$

$$\tau_s = -t / \ln \theta \quad (3)$$

$$\theta = (T_{\text{amb}} - T) / (T_{\text{amb}} - T_{\max}) \quad (4)$$

where  $h$  is the heat transfer coefficient,  $S$  is the surface area of the container,  $m$  is the mass of products ( $m = 1\text{g}$ ),  $\tau_s$  is a system time constant,  $C_p$  is specific heat capacity of solvent ( $C_{p, \text{water}} = 4.2\text{ J/mol}$ ),  $I$  is incident laser power ( $2.0\text{ W/cm}^2$ ),  $\eta$  is the photothermal conversion efficiency,  $A$  indicates the absorbance of BP-Au NSs ( $A_{808} = 1.04$ ) and BP NSs at  $808\text{ nm}$  ( $A_{808} = 0.88$ ),  $T_{\text{amb}}$  is ambient temperature of the surroundings,  $T_{\max}$  and  $T_{\max, \text{water}}$  are the equilibrium temperature of BP-Au NSs solution and water, respectively.

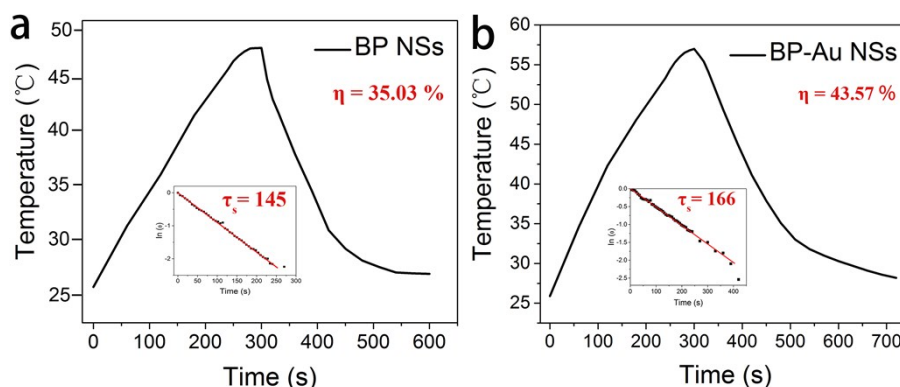

Fig. S3 Photothermal properties of BP NSs and BP-Au NSs. (a, b) Plots of the temperature vs time for the BP NSs (1g,  $OD_{808} = 0.88$ ) and BP-Au NSs (1g,  $OD_{808} = 1.04$ ) during laser irradiation ( $808\text{ nm}$ ,  $2\text{ W/cm}^2$ ) and cooling (laser off). The insert plots show the cooling time vs  $-\ln \theta$ . On the basis of the linear regression analysis, the time constant for heat transfer  $\tau_s$  (the slope of the plot) was determined to be 145 s and 166 s, respectively.

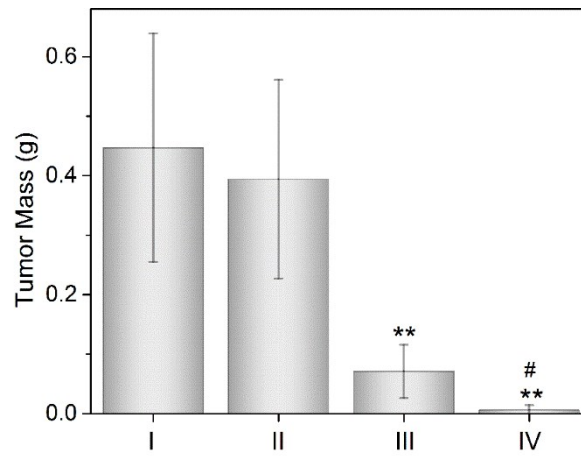

Fig S4 Average weights of tumors collected from different groups of mice. (group I: PBS with laser; group II: BP-Au NSs without laser; group III: BP NSs with laser; group IV: BP-Au NSs with laser). Data are presented as mean  $\pm$  SD. \*\* indicates  $P < 0.01$  versus group I, and # indicates  $P < 0.05$  versus group III.

#### References:

- 1 C. Sun, L. Wen, J. Zeng, Y. Wang, Q. Sun, L. Deng, C. Zhao and Z. Li, *Biomaterials*, 2016, **91**, 81-89.
